# Supplementary material for: RETRACTED: Palmitic Acid Impedes Extravillous Trophoblast Activity by Increasing MRP1 Expression and Function
Source: MDPI journal article supplement (doi:10.3390/biom12081162), 2022-08-22
Supplement: s1 [file s1]

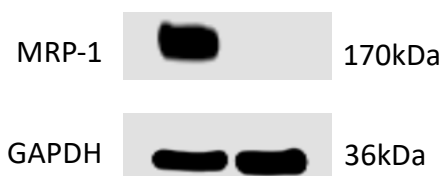

**Figure S1: Knockout of ABCC1 gene by Crispr/Cas9.** Knockout of the ABCC1 gene by Crispr/Cas 9 in Swan-71 cells was confirmed with western blots of cell lysates for MRP1. The experiment was run three separate times.

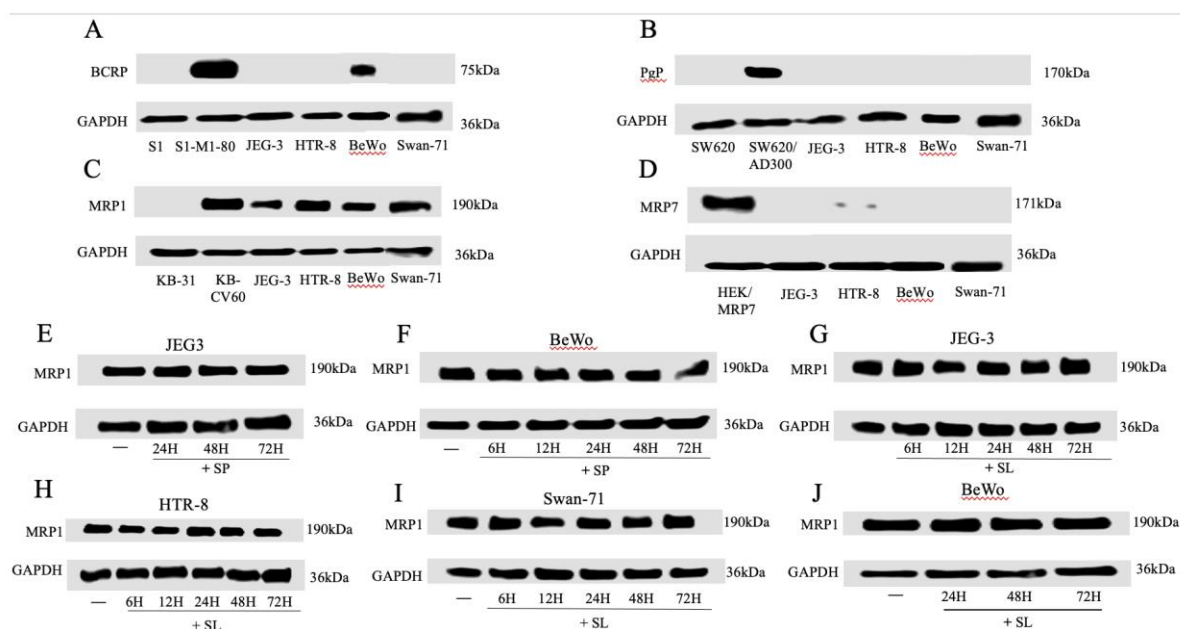

**Figure S2: Expression of ABC transporters in the placental cell lines and effect of linoleic and palmitic acids in the placental cell lines.** Expression of BCRP (A), PgP (B), MRP1 (C) and MRP7 (D) in the placental cell lines. Effect of 0.5 mM palmitic acid on the MRP1 expression in JEG-3 (E) and BeWo (F) cell lines. Effect of 1mM linoleic acid on the MRP1 expression in JEG-3 (G), HTR-8 (H), Swan-71 (I), and BeWo (J) cell lines.
