# Supplementary material
Source: MDPI journal article supplement (https://www.mdpi.com/2218-273X/12/8/1162)
Supplement: s1 [file s1]

Archive with 1 entries (1 files):
- biomolecules-1868421-supplementary.pdf
